# Supplementary material for: Oxygen vacancy distributions and electron localization in a CeO2(100) nanocube
Source: Royal Society of Chemistry journal article supplement (doi:10.1039/d1qi01179k), 2021-11-16
Supplement: d1qi01179k1.pdf [file d1qi01179k1.pdf]

## Supplementary Information:

# Oxygen Vacancy Distribution and Electron Localization on Nanocube CeO<sub>2</sub> (100)

Weihua Ji,<sup>a</sup> Na Wang,<sup>\*a</sup> Qiang Li,<sup>a</sup> He Zhu,<sup>b</sup> Kun Lin,<sup>a</sup> Jinxia Deng,<sup>a</sup> Jun Chen,<sup>a</sup> Hongjie Zhang,<sup>c</sup> and Xianran Xing<sup>\*a</sup>

<sup>a</sup> Beijing Advanced Innovation Center for Materials Genome Engineering, Institute of Solid State Chemistry, University of Science and Technology Beijing, Beijing, 100083, China. Email: [nawang@ustb.edu.cn](mailto:nawang@ustb.edu.cn); [xing@ustb.edu.cn](mailto:xing@ustb.edu.cn)

<sup>b</sup> Department of Physics, City University of Hong Kong, Hong Kong 999077, China

<sup>c</sup> State Key Laboratory of Rare Earth Resource Utilization Changchun Institute of Applied Chemistry, Chinese Academy of Sciences, Changchun, 130022, China

# CONTENTS

|               |   |
|---------------|---|
| Fig.S1.....   | 1 |
| Fig.S2.....   | 1 |
| Table S1..... | 2 |
| Table S2..... | 2 |
| Table S3..... | 2 |
| Fig.S3.....   | 3 |
| Fig.S4.....   | 4 |
| Fig.S5.....   | 4 |
| Fig.S6.....   | 5 |
| Fig.S7.....   | 6 |
| Fig.S8.....   | 7 |
| Fig.S9.....   | 8 |

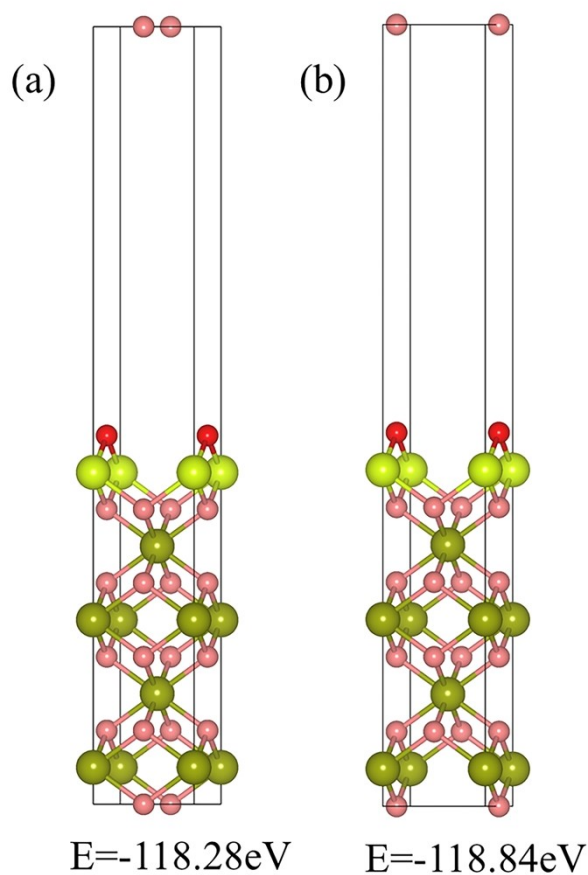

Fig. S1. Surface energy (in eV) for the  $\text{CeO}_2$  (100) surface of (a) an asymmetrical and (b) symmetrical slab model. The color coding of atoms at different layers is depicted. Yellow and red balls respectively stand for Ce and surface O atoms.

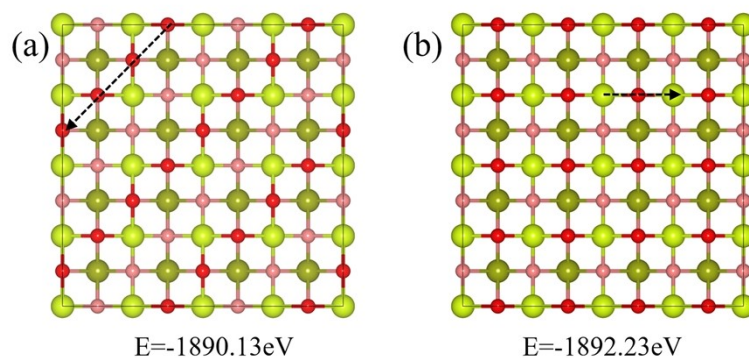

Fig. S2. Surface energy (eV) for the  $\text{CeO}_2$  (100) surface about different oxygen vacancy orientation along the (a)  $\langle 100 \rangle$  and (b)  $\langle 110 \rangle$  directions.

Table S1. Surface energy (in J/m<sup>2</sup>) with different numbers of Layers (L) for CeO<sub>2</sub>(100) surface.

| <b>CeO<sub>2</sub>(100)</b> |       |       |       |
|-----------------------------|-------|-------|-------|
| Layers                      | 11    | 15    | 19    |
| E <sub>surf</sub>           | 1.516 | 1.523 | 1.533 |

Table S2. Surface energy (in J/m<sup>2</sup>) for CeO<sub>2</sub>(111), (110) and (100) surface.

| <b>CeO<sub>2</sub></b> | <b>(111)</b> | <b>(110)</b> | <b>(100)</b> |
|------------------------|--------------|--------------|--------------|
| Layers                 | 12           | 7            | 11           |
| E <sub>surf</sub>      | 0.751        | 1.144        | 1.516        |

Table S3. Surface energy (in eV) after occupation matrix control of the unique f orbitals containing a single oxygen vacancy ( $O_{vac}^{sur}$ ) on CeO<sub>2</sub>(100) surface.

|           | <b>f<sub>3</sub></b>                 | <b>f<sub>2</sub></b> | <b>f<sub>1</sub></b> | <b>f<sub>0</sub></b> | <b>f<sub>1</sub></b> | <b>f<sub>2</sub></b>                | <b>f<sub>3</sub></b>                 |
|-----------|--------------------------------------|----------------------|----------------------|----------------------|----------------------|-------------------------------------|--------------------------------------|
| <b>f</b>  | fy(3x <sup>2</sup> -y <sup>2</sup> ) | fxyz                 | fyz <sup>2</sup>     | fz <sup>3</sup>      | fxz <sup>2</sup>     | fz(x <sup>2</sup> -y <sup>2</sup> ) | fx(x <sup>2</sup> -3y <sup>2</sup> ) |
| <b>E</b>  | -1885.92                             | -1885.98             | -1885.83             | -1885.91             | -1885.96             | -1885.86                            | -1885.95                             |
| <b>ΔE</b> | 0.06                                 | 0                    | 0.15                 | 0.07                 | 0.02                 | 0.12                                | 0.03                                 |

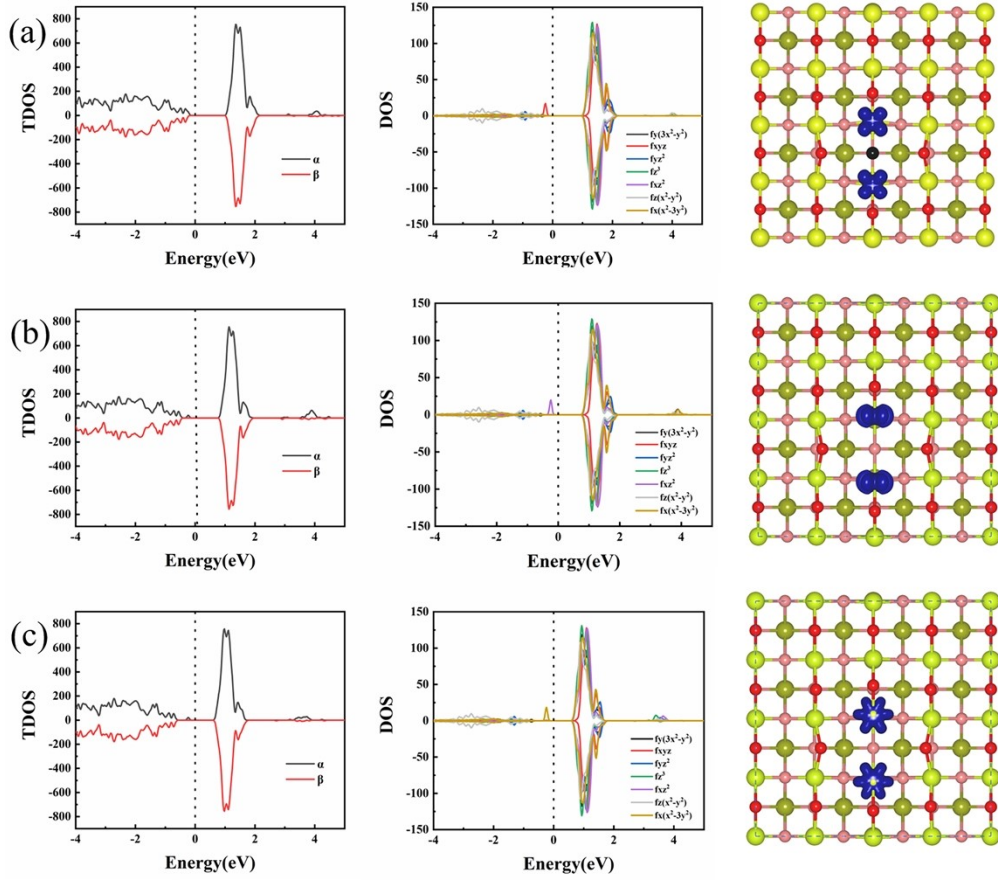

Fig. S3. Electron structures (a)  $f_2$ , (b)  $f_1$  and (c)  $f_3$  orbital after occupation matrix containing a single oxygen vacancy ( $O_{vac}^{sur}$ ) on  $CeO_2(100)$  surface. (left: Total DOS, middle: particle DOS of 4f orbitals of  $Ce^{3+}$  ions and right: the isosurface of spin charge densities). The Fermi level is zero at in energy.

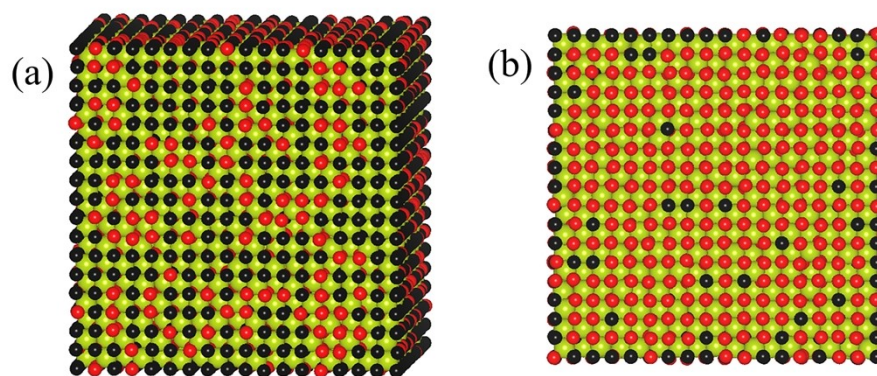

Fig. S4. Distribution of oxygen vacancies (a) the surface and (b) the interior during the Reverse Monte Carlo (RMC) simulation. Yellow and red balls respectively stand for Ce and O atoms and black balls for O vacancies.

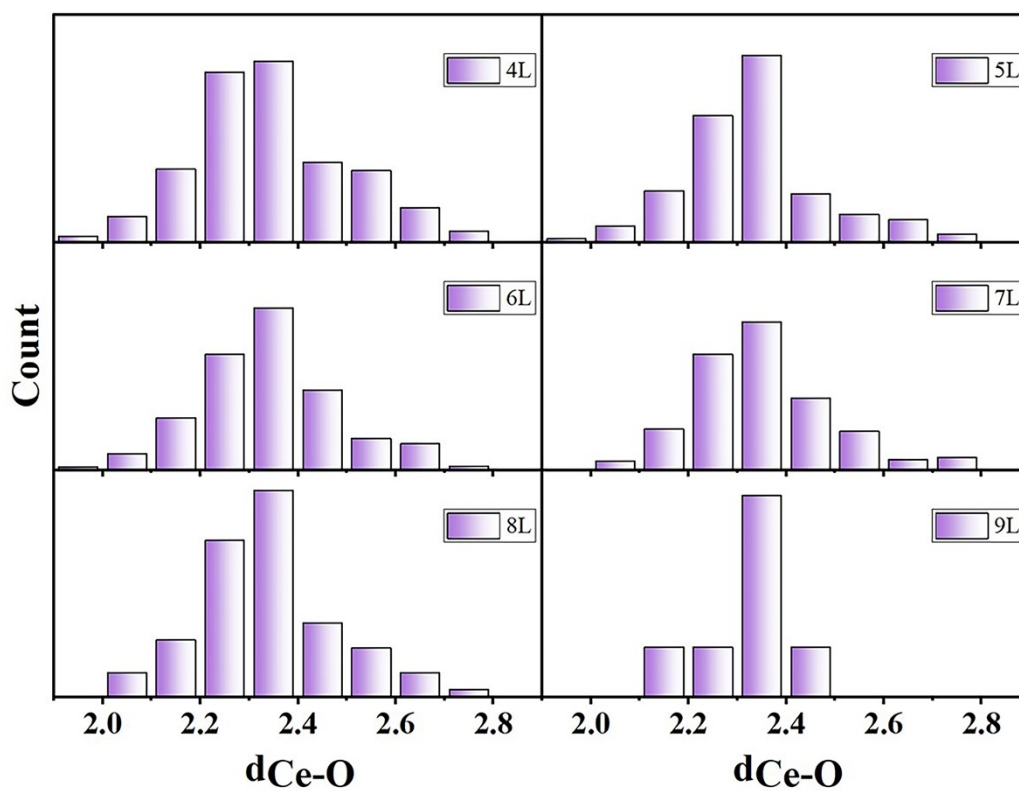

Fig. S5. Pair-distance statistics of Ce-O pairs from the fourth layer surface to the interior.

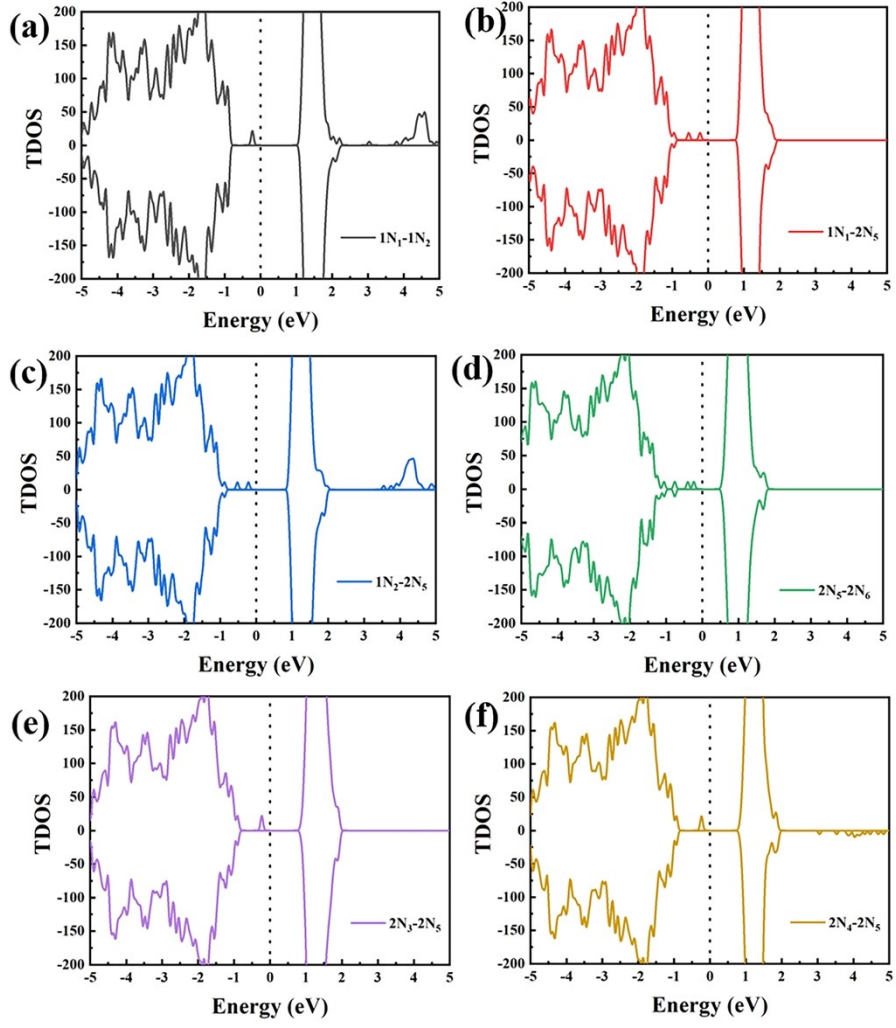

Fig. S6. Total DOS of  $O_{vac}^{sur}$  which are localized on the two  $Ce^{3+}$  ions neighboring the oxygen vacancy on (a)  $1N_1-1N_2$ , (b)  $1N_1-2N_5$ , (c)  $1N_2-2N_5$ , (d)  $2N_5-2N_6$ , (e)  $2N_3-2N_5$  and (f)  $2N_4-2N_5$  on  $CeO_2(100)$  surface respectively.

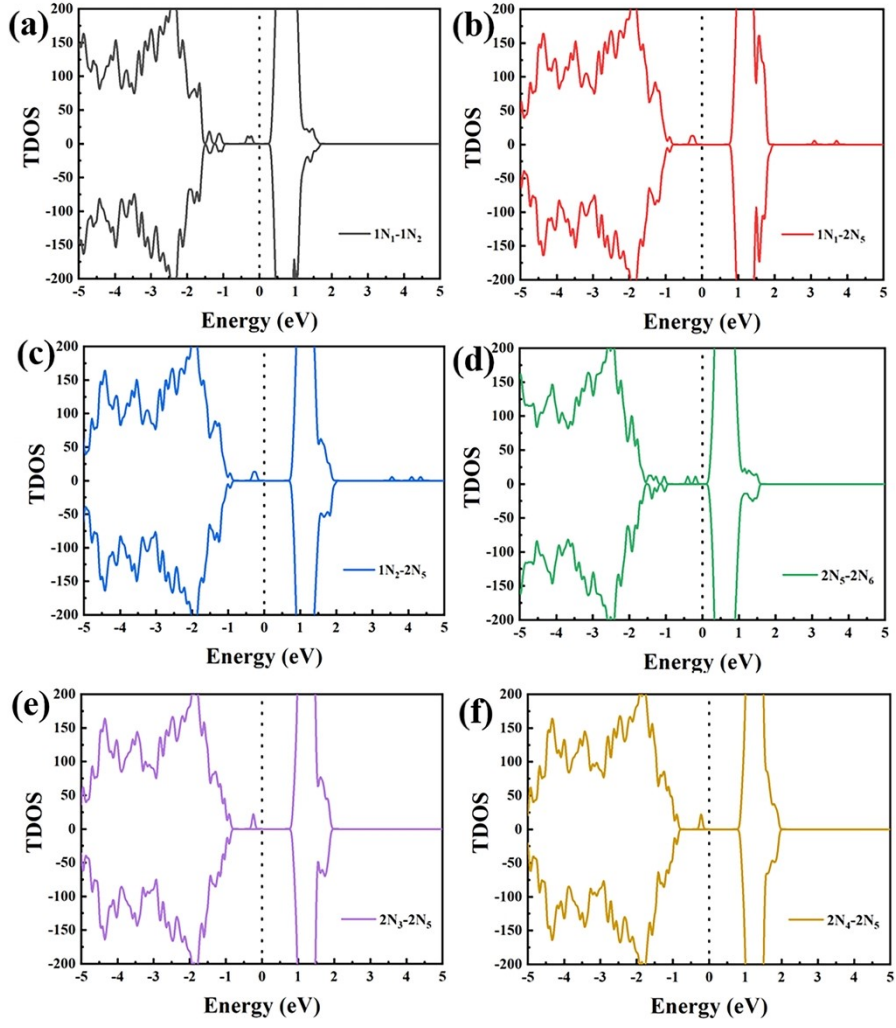

Fig. S7. Total DOS of  $O_{vac}^{sub1}$  which are localized on the two  $Ce^{3+}$  ions neighboring the oxygen vacancy on (a)  $1N_1-1N_2$ , (b)  $1N_1-2N_5$ , (c)  $1N_2-2N_5$ , (d)  $N_5-2N_6$ , (e)  $2N_3-2N_5$  and (f)  $2N_4-2N_5$  on  $CeO_2(100)$  surface respectively.



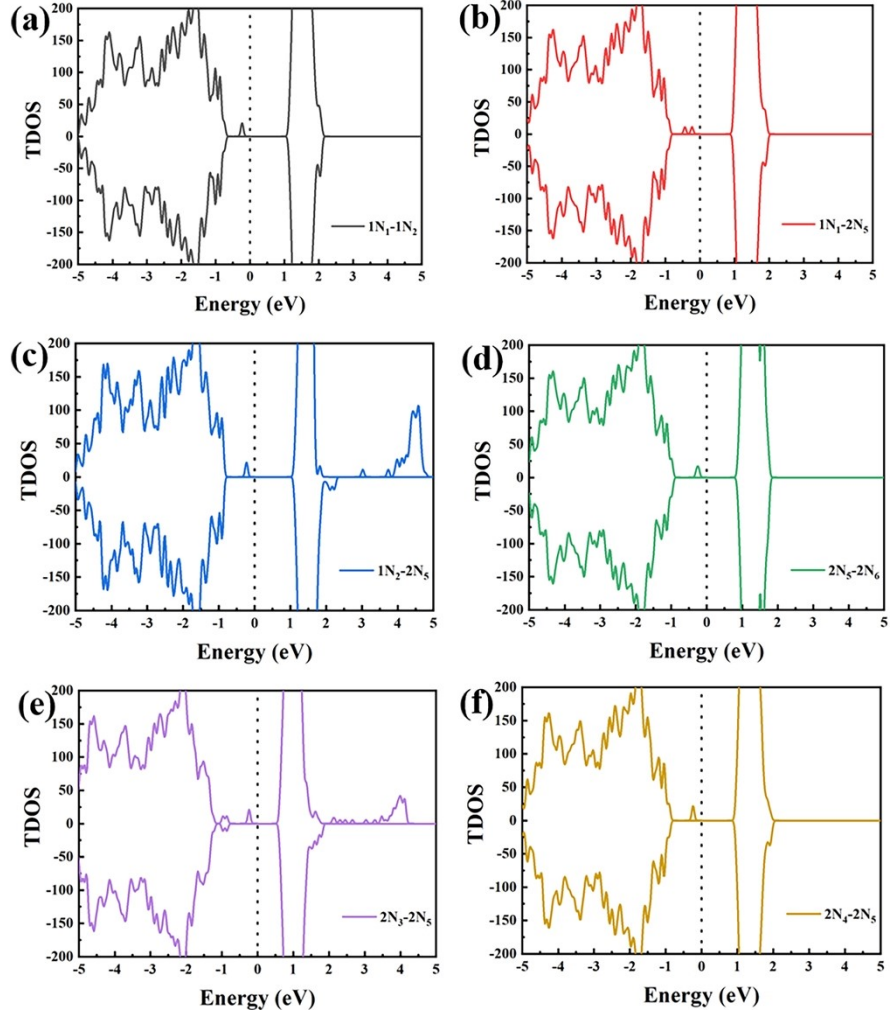

Fig. S8. Total DOS of  $O_{vac}^{sub2}$  which are localized on the two  $Ce^{3+}$  ions neighboring the oxygen vacancy on (a)  $1N_1-1N_2$ , (b)  $1N_1-2N_5$ , (c)  $1N_2-2N_5$ , (d)  $N_5-2N_6$ , (e)  $2N_3-2N_5$  and (f)  $2N_4-2N_5$  on  $CeO_2(100)$  surface respectively.

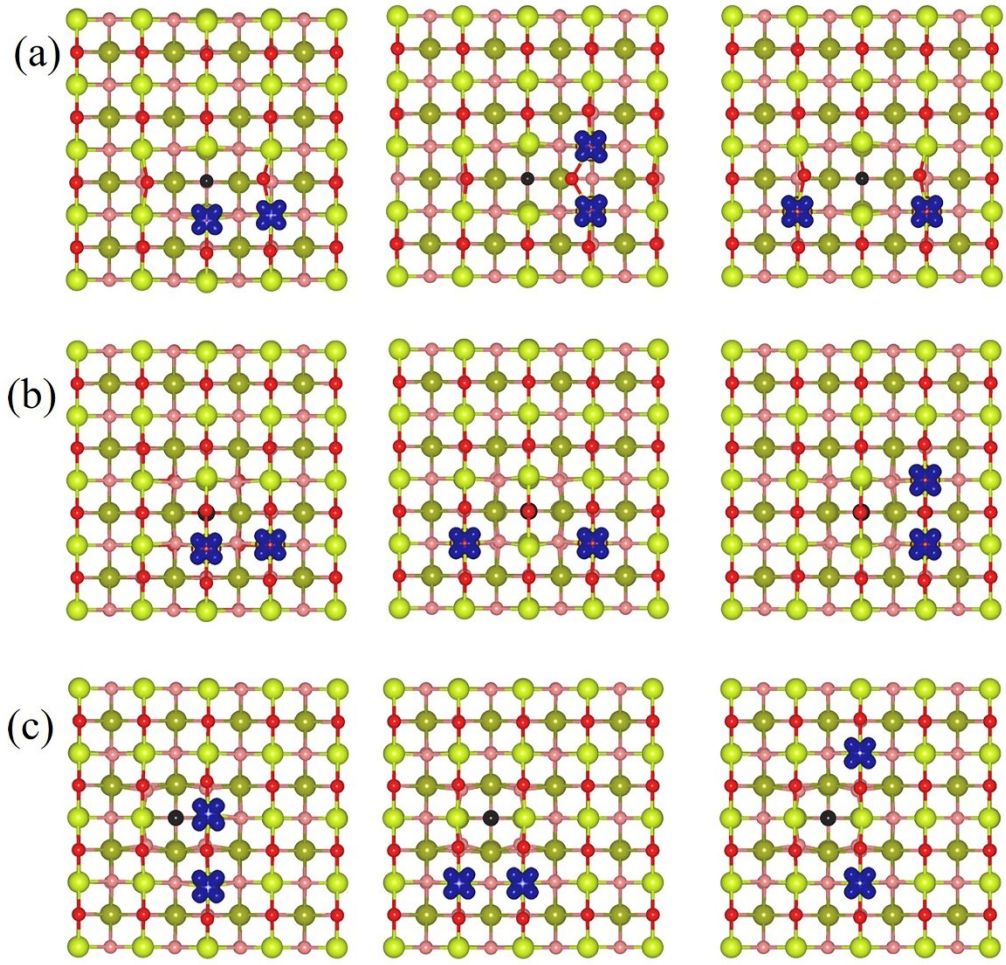

Fig. S9. Calculated structures of the  $\text{CeO}_2$  (100) surface (top view) containing single (a) surface ( $O_{vac}^{sur}$ ) (b) subsurface1 ( $O_{vac}^{sub1}$ ) and (c) subsurface2 ( $O_{vac}^{sub2}$ ) oxygen vacancy. The isosurface of spin charge densities are blue, which are localized on the two Ce ions neighboring the oxygen vacancy on  $1N_1$ - $2N_5$ (left panel),  $2N_5$ - $2N_6$ (middle panel) and  $2N_3$ - $2N_5$ (right panel) respectively.
